# Supplementary material
Source: PubMed Central journal article supplement (PMC6800621)
Supplement: NIHMS1530311-supplement-7.pdf [file NIHMS1530311-supplement-7.pdf]

**A**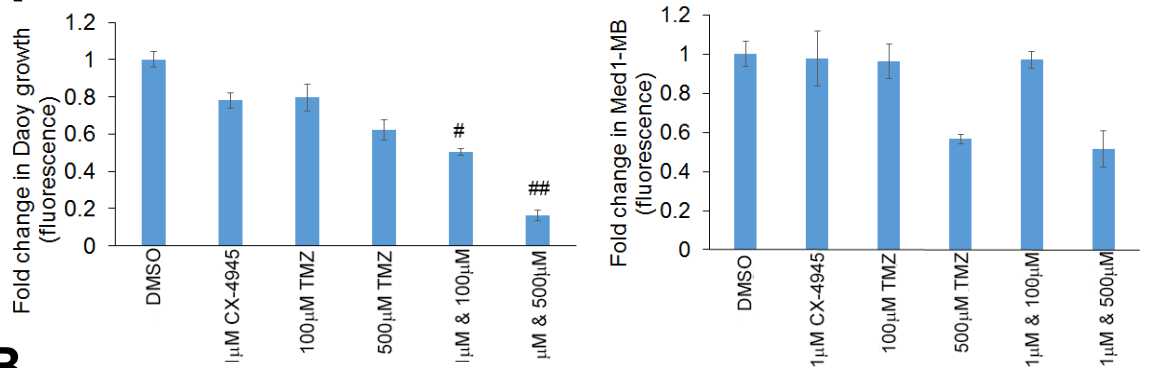**B**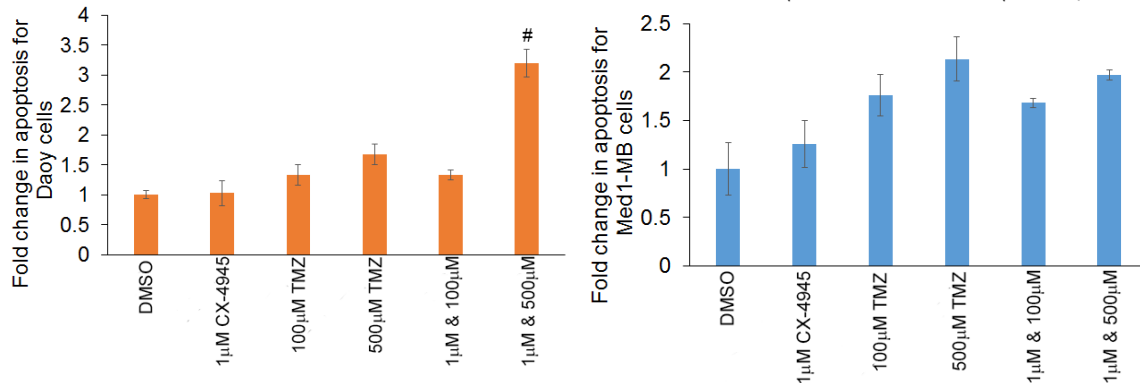**C**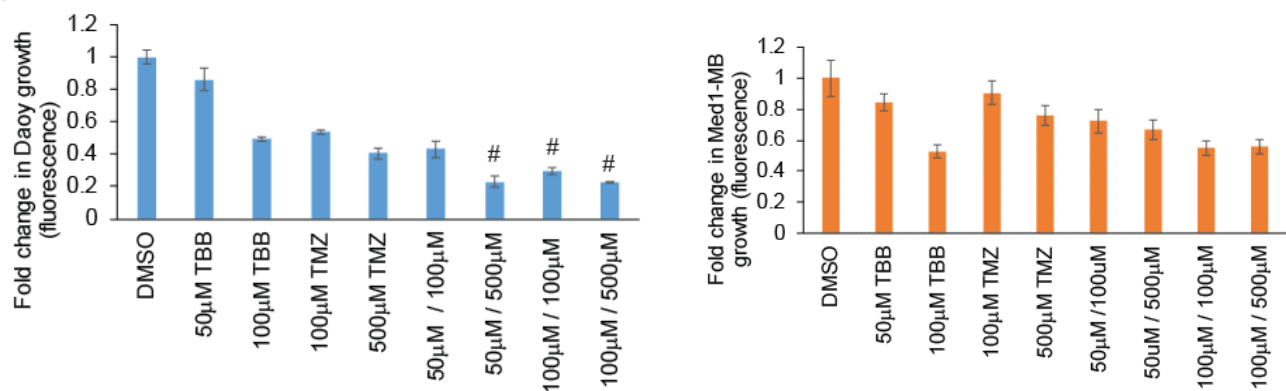**D**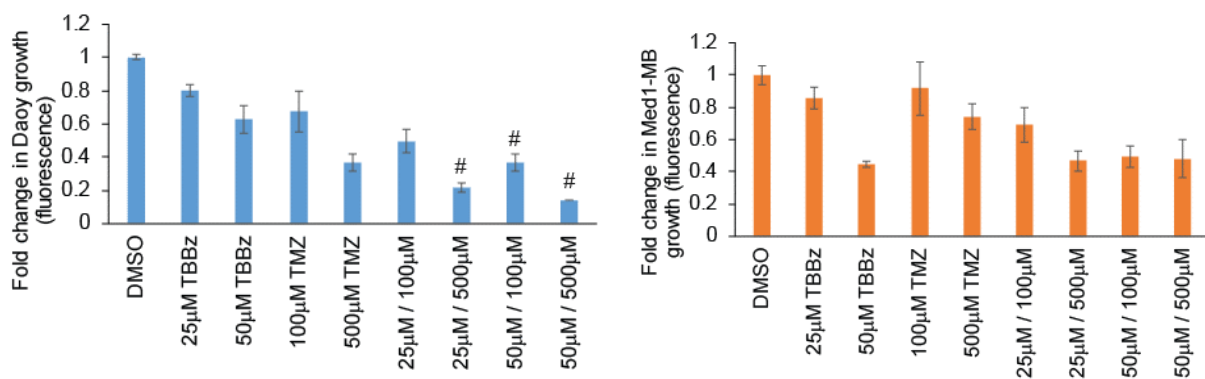

**Supplementary Figure S6.** Combinatorial treatment of Daoy and Med1-MB cells with CK2 inhibitors and TMZ.
