# Supplementary material
Source: PubMed Central journal article supplement (PMC6800621)

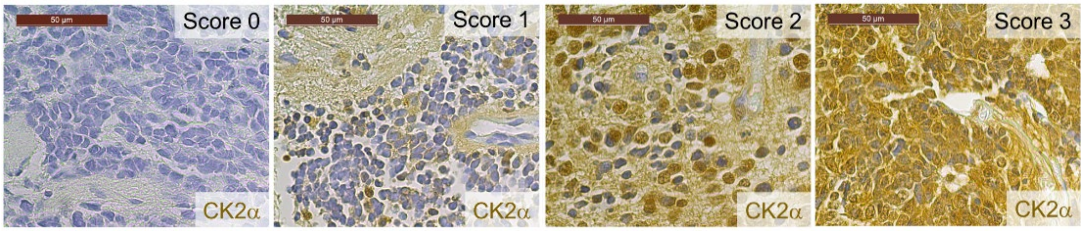

**Supplementary Figure S1. CK2 expression from Tissue Micro Array.**

Supplement: NIHMS1530311-supplement-2.pdf [file NIHMS1530311-supplement-2.pdf]

**A**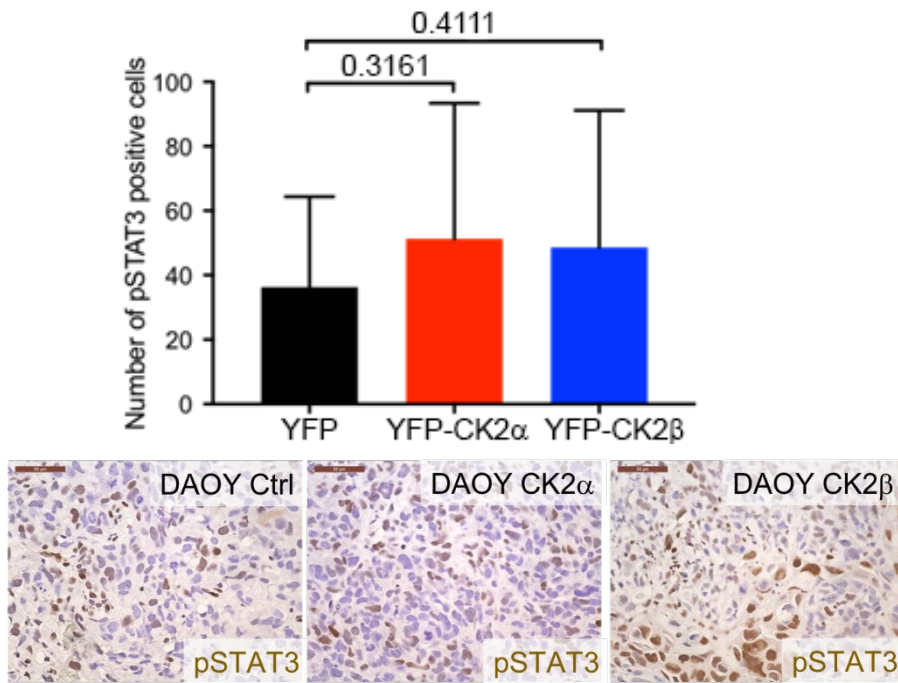**B**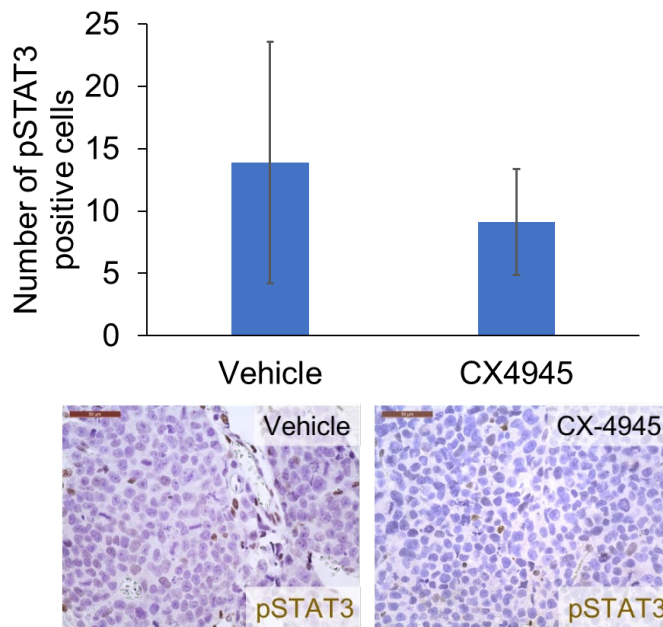

**Supplementary Figure S2. Phosphorylated STAT3 positive cells from mouse xenografts.**

Supplement: NIHMS1530311-supplement-3.pdf [file NIHMS1530311-supplement-3.pdf]

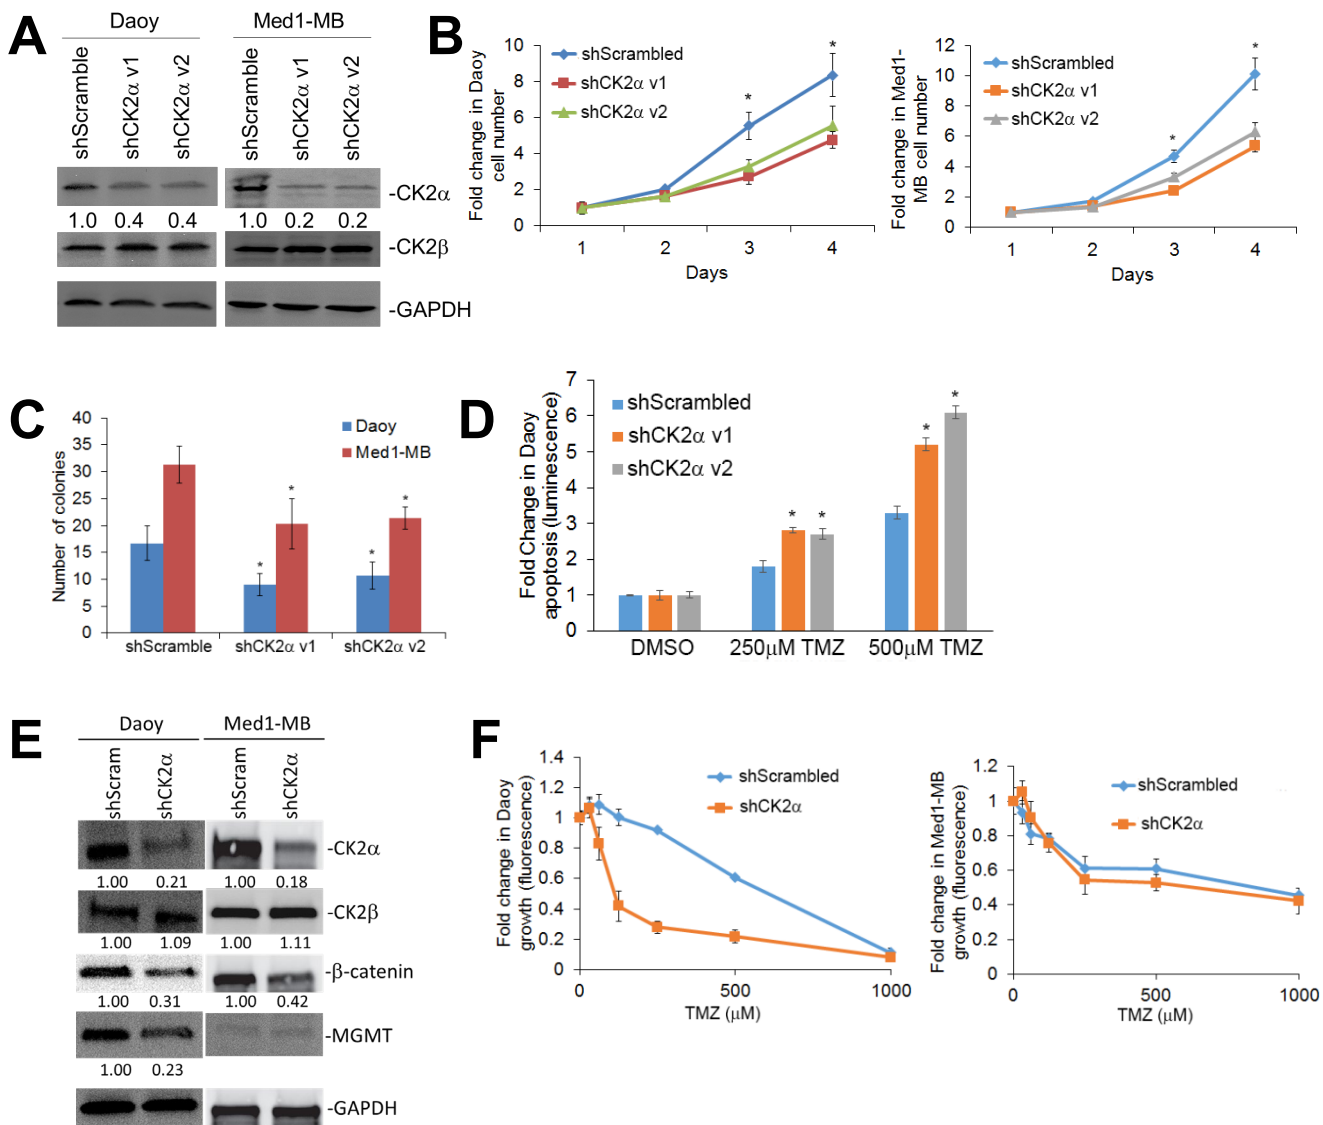

**Supplementary Figure S3. Decreasing CK2 $\alpha$  using shRNA inhibits MB growth.**

Supplement: NIHMS1530311-supplement-4.pdf [file NIHMS1530311-supplement-4.pdf]

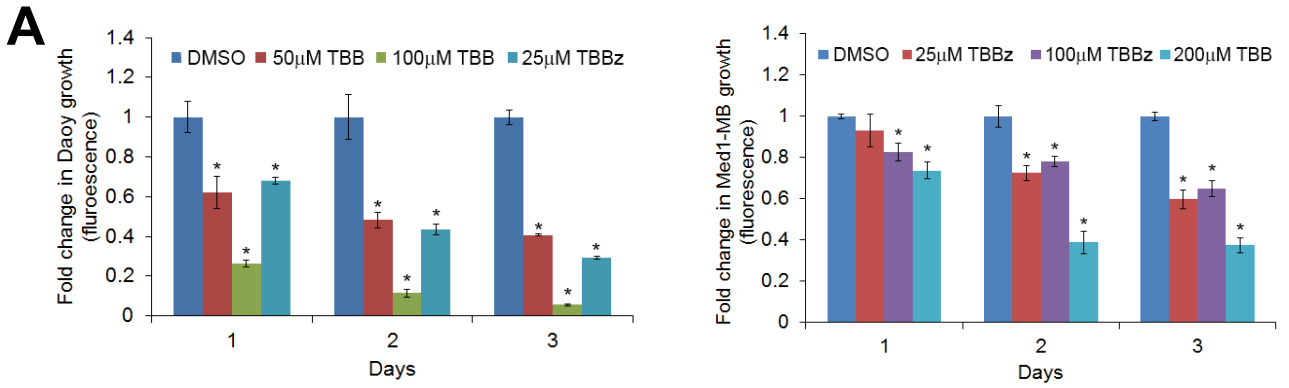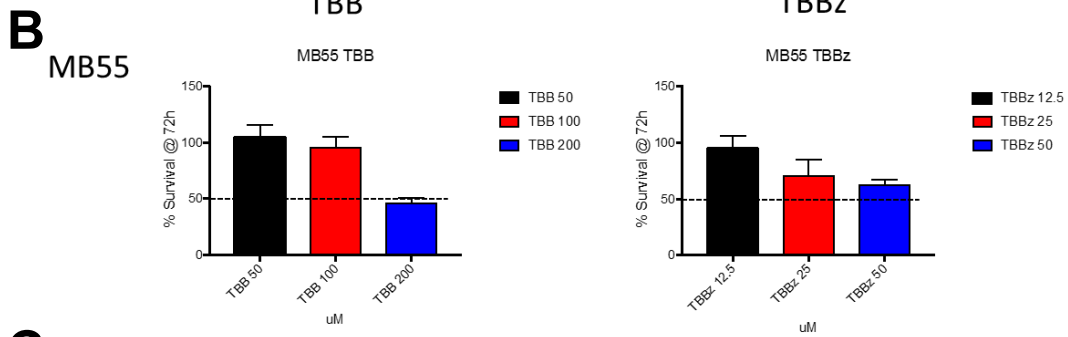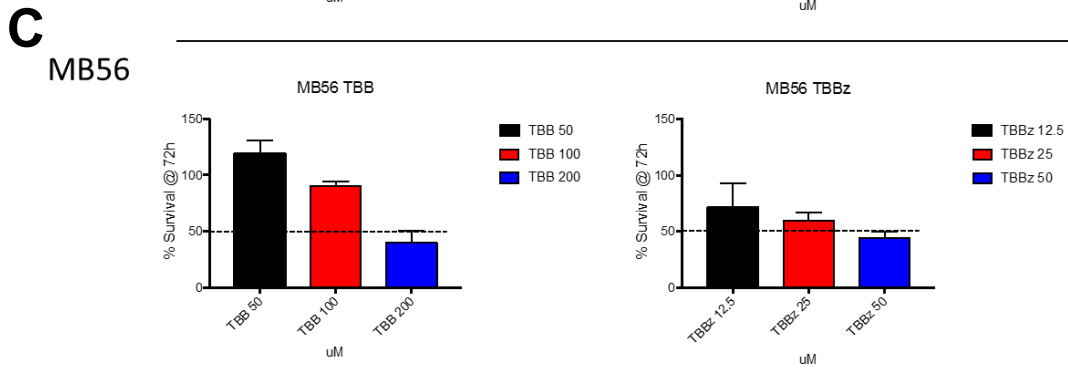

**Supplementary Figure S4. Growth of MB cells treated with TBB or TBBz.**

Supplement: NIHMS1530311-supplement-5.pdf [file NIHMS1530311-supplement-5.pdf]

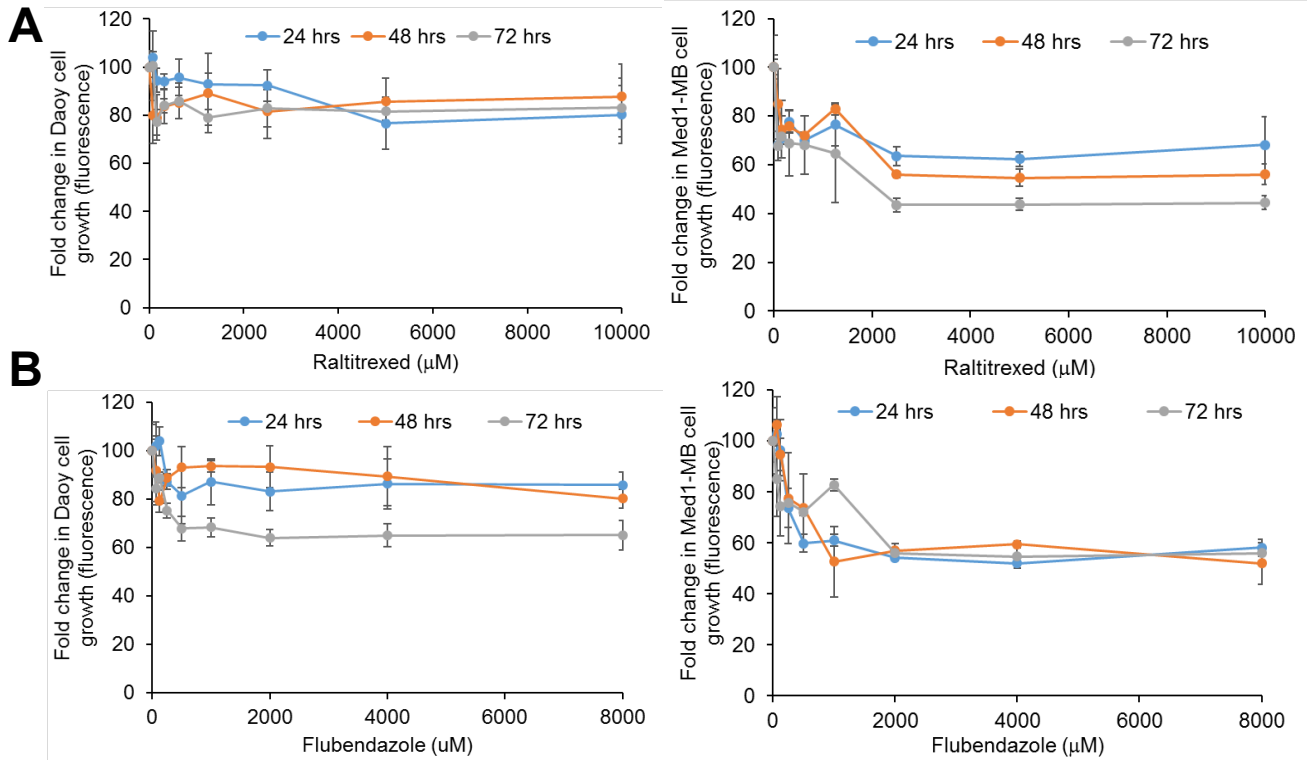

**Supplementary Figure S5. Growth of MB cells treated with raltitrexed or flubendazole.**

Supplement: NIHMS1530311-supplement-6.pdf [file NIHMS1530311-supplement-6.pdf]

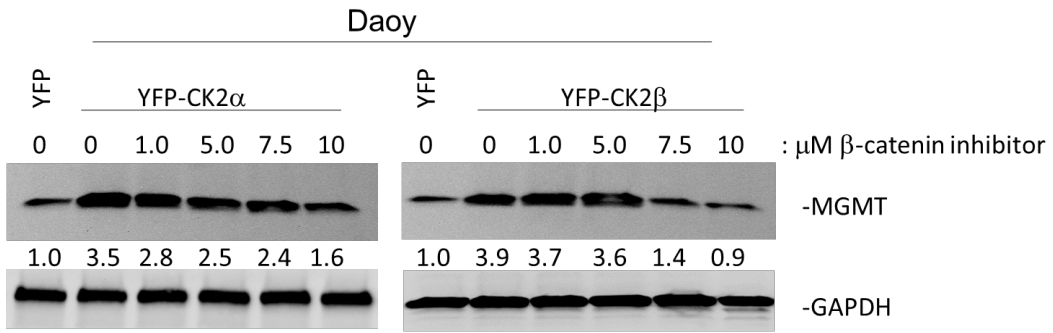

**Supplementary Figure S7. Inhibition of  $\beta$ -catenin restored MGMT levels to endogenous levels.**

Supplement: NIHMS1530311-supplement-8.pdf [file NIHMS1530311-supplement-8.pdf]
